# Supplementary material for: Autophagy and autophagy-related pathways in cancer
Source: Springer Nature journal article supplement (doi:10.1038/s41580-023-00585-z), 2023-03-02
Supplement: MOESM1 [file 41580_2023_585_MOESM1_ESM.pdf]

# Autophagy and autophagy-related pathways in cancer

In the format provided by the  
authors and unedited

## Supplementary Box 1: LC3 conjugation as a mediator of autophagy-related processes

LC3-associated processes are defined here as those requiring LC3 lipidation on pre-formed single membranes in the absence of de novo formation of autophagosomes. Similar to autophagy, this form of LC3 lipidation invariably requires the conjugation machinery, including ATG3, ATG4, ATG7, ATG5–ATG12, and ATG16L1 (Ref.<sup>1</sup>). Interestingly, specific domains within the C-terminus of ATG16L1, namely the WD40 domain<sup>2</sup> and C-terminal lipid binding domain (VRV motif)<sup>3</sup>, are required for conjugation of ATG8 to single membranes (CASM) but not autophagosome formation. In addition, all types of CASM occur independently of ULK complex components (including ULK1, FIP200, and ATG13) and the autophagosomal VPS34 complex component, ATG14 (Ref.<sup>1,4</sup>). Additional requirements for upstream components depend on the specific CASM cargo or inducer. In the case of LC3-associated phagocytosis (LAP) induced by *Aspergillus fumigatus* infection, a Rubicon-containing VPS34 complex (including Beclin-1 and VPS15) as well as NADPH oxidase 2 (NOX2) are required<sup>1</sup>. Rubicon was shown to suppress autophagy while its role in regulating the endolysosomal system remains unclear<sup>5,6</sup>. The specific requirements of protein complexes for different CASM processes are summarised in the table below. The ultimate consequences of these LC3-related processes are variable. During LAP, LC3 lipidation facilitates the recruitment of lysosomal hydrolases resulting in the clearance of immunogenic signals thereby suppressing pro-inflammatory signals<sup>6</sup>. CASM also has non-degradative functions whereby LC3-associated endocytosis (LANDO) affect surface receptor recycling<sup>7</sup>, while LC3-dependent EV loading and secretion (LDELS) is required for specific cargo loading on EVs<sup>8</sup>. The relevance of LAP-like LC3 conjugation on endosomal vesicles induced by treatment with drugs (such as chloroquine, CQ) remains unclear<sup>9</sup>.

### Requirement of protein complexes in autophagy and LC3-associated processes.

| Protein/complex                         | Autophagy | LAP          | LDELS               | LANDO             | Drug induced LAP-like |
|-----------------------------------------|-----------|--------------|---------------------|-------------------|-----------------------|
| <b>Requirement of protein complexes</b> |           |              |                     |                   |                       |
| ULK complex                             | ✓         | X            | X                   | X                 | X                     |
| ATG14-containing VPS34 complex          | ✓         | X            | X                   | X                 | X                     |
| Rubicon-containing VPS34 complex        | X         | ✓            | NR                  | ✓                 | X                     |
| ATG4                                    | ✓         | ✓            | NR                  | ✓                 | NR                    |
| Conjugation machinery                   | ✓         | ✓            | ✓                   | ✓                 | ✓                     |
| ATG16L1 WD40                            | X         | ✓            | NR                  | NR                | ✓                     |
| ATG16L1 VRV                             | X         | NR           | NR                  | NR                | ✓                     |
| <b>Consequence of activation</b>        |           |              |                     |                   |                       |
| Overall outcome of                      | Cargo     | Clearance of | Specific loading of | Recycling of cell | NR                    |

|                           |                           |                       |              |           |   |
|---------------------------|---------------------------|-----------------------|--------------|-----------|---|
| <i>pathway activation</i> | degradation and recycling | immunogenic fragments | cargo on EVs | receptors |   |
| <i>References</i>         | 10                        | 6                     | 8            | 7         | 9 |

Table footnotes: NR, not reported; LAP, LC3-associated phagocytosis; LANDO, LC3-associated endocytosis; LDELS, LC3-dependent extracellular vesicle loading and secretion.

## Supplementary Box 2: Autophagy Cargo Receptors Mediate Selective Autophagy

Autophagy cargo receptors (ACRs) mediate the selective autophagic degradation of proteins and organelles. In mammalian cells, this growing family of proteins includes p62 (also called SQSTM1 for sequestosome 1), NBR1, OPTN, NDP52, BNIP3, TAX1BP1, and TOLLIP (Ref.<sup>11</sup>). These proteins typically interact with the autophagosomal membrane via an LC3-interacting region (LIR), which mediates binding to LC3 and other ATG8 family proteins. In addition, many ACRs possess a C-terminal ubiquitin binding domain (UBD), which allows these proteins to bind to a large array of ubiquitinated proteins<sup>12</sup>. This has motivated the working hypothesis that ACRs act as a bridge to selectively capture cargo during autophagy via UBD binding to ubiquitinated cargo, which is coupled through a LIR-dependent interaction of the ACR with LC3 on the autophagosomal membrane<sup>11</sup>. In addition to ubiquitin, other post-translational modifications and oligomerization of ACRs are proposed to play important roles in facilitating selective autophagy. For example, the phosphorylation of Ser403 and Ser409 on the p62-UBD enhances its avidity for ubiquitin chains, which facilitates both autophagic cargo recognition and clearance<sup>13,14</sup>. Similarly, phosphorylation of LIR motifs promotes binding affinity for LC3 (Ref.<sup>15</sup>). More recent work has uncovered that ACRs form phase-separated condensates in cells, which requires ubiquitin chains<sup>16,17</sup>. Remarkably, p62 oligomerizes via PB1 domains which, along with ubiquitin binding, may promote the formation of these phase-separated condensates<sup>17</sup>. Moreover, NBR1 facilitates p62-positive condensate formation and the overexpression of NBR1 prevents the autophagic clearance of p62 condensates<sup>18</sup>. How phase separation of ACRs influences oncogenesis and cancer progression, both in the setting of autophagy competence and deficiency, remains an important unanswered question.

## References

- 1 Martinez, J. *et al.* Molecular characterization of LC3-associated phagocytosis reveals distinct roles for Rubicon, NOX2 and autophagy proteins. *Nat Cell Biol* **17**, 893-906, doi:10.1038/ncb3192 (2015).
- 2 Fletcher, K. *et al.* The WD40 domain of ATG16L1 is required for its non-canonical role in lipidation of LC3 at single membranes. *EMBO J* **37**, doi:10.15252/embj.201797840 (2018).
- 3 Lystad, A. H. *et al.* Distinct functions of ATG16L1 isoforms in membrane binding and LC3B lipidation in autophagy-related processes. *Nat Cell Biol* **21**, 372-383, doi:10.1038/s41556-019-0274-9 (2019).
- 4 Florey, O., Kim, S. E., Sandoval, C. P., Haynes, C. M. & Overholtzer, M. Autophagy machinery mediates macroendocytic processing and entotic cell death by targeting single membranes. *Nat Cell Biol* **13**, 1335-1343, doi:10.1038/ncb2363 (2011).
- 5 Zhong, Y. *et al.* Distinct regulation of autophagic activity by Atg14L and Rubicon associated with Beclin 1-phosphatidylinositol-3-kinase complex. *Nat Cell Biol* **11**, 468-476, doi:10.1038/ncb1854 (2009).
- 6 Cunha, L. D. *et al.* LC3-Associated Phagocytosis in Myeloid Cells Promotes Tumor Immune Tolerance. *Cell* **175**, 429-441.e416, doi:10.1016/j.cell.2018.08.061 (2018).
- 7 Heckmann, B. L. *et al.* LC3-Associated Endocytosis Facilitates  $\beta$ -Amyloid Clearance and Mitigates Neurodegeneration in Murine Alzheimer's Disease. *Cell* **178**, 536-551.e514, doi:10.1016/j.cell.2019.05.056 (2019).
- 8 Leidal, A. M. *et al.* The LC3-conjugation machinery specifies the loading of RNA-binding proteins into extracellular vesicles. *Nat Cell Biol* **22**, 187-199, doi:10.1038/s41556-019-0450-y (2020).
- 9 Jacquin, E. *et al.* Pharmacological modulators of autophagy activate a parallel noncanonical pathway driving unconventional LC3 lipidation. *Autophagy* **13**, 854-867, doi:10.1080/15548627.2017.1287653 (2017).
- 10 Nishimura, T. & Tooze, S. A. Emerging roles of ATG proteins and membrane lipids in autophagosome formation. *Cell Discov* **6**, 32, doi:10.1038/s41421-020-0161-3 (2020).
- 11 Lamark, T. & Johansen, T. Mechanisms of Selective Autophagy. *Annu Rev Cell Dev Biol* **37**, 143-169, doi:10.1146/annurev-cellbio-120219-035530 (2021).
- 12 Kirkin, V. & Rogov, V. V. A Diversity of Selective Autophagy Receptors Determines the Specificity of the Autophagy Pathway. *Mol Cell* **76**, 268-285, doi:10.1016/j.molcel.2019.09.005 (2019).
- 13 Lim, J. *et al.* Proteotoxic stress induces phosphorylation of p62/SQSTM1 by ULK1 to regulate selective autophagic clearance of protein aggregates. *PLoS Genet* **11**, e1004987, doi:10.1371/journal.pgen.1004987 (2015).
- 14 Matsumoto, G., Wada, K., Okuno, M., Kurosawa, M. & Nukina, N. Serine 403 phosphorylation of p62/SQSTM1 regulates selective autophagic clearance of ubiquitinated proteins. *Mol Cell* **44**, 279-289, doi:10.1016/j.molcel.2011.07.039 (2011).
- 15 Wild, P. *et al.* Phosphorylation of the autophagy receptor optineurin restricts Salmonella growth. *Science* **333**, 228-233, doi:10.1126/science.1205405 (2011).
- 16 Sun, D., Wu, R., Zheng, J., Li, P. & Yu, L. Polyubiquitin chain-induced p62 phase separation drives autophagic cargo segregation. *Cell Res* **28**, 405-415, doi:10.1038/s41422-018-0017-7 (2018).
- 17 Zaffagnini, G. *et al.* p62 filaments capture and present ubiquitinated cargos for autophagy. *EMBO J* **37**, doi:10.15252/embj.201798308 (2018).
- 18 Sanchez-Martin, P. *et al.* NBR1-mediated p62-liquid droplets enhance the Keap1-Nrf2 system. *EMBO Rep* **21**, e48902, doi:10.15252/embr.201948902 (2020).
